# Supplementary material for: Prussian blue analogue (PBA) derived cobalt telluride nano-granules: an efficient catalyst for energy conversion and storage
Source: Royal Society of Chemistry journal article supplement (doi:10.1039/d2se00665k), 2022-01-01
Supplement: d2se00665k1.pdf [file d2se00665k1.pdf]

## Supporting Information

### **Prussian blue analogue (PBA) derived Cobalt Telluride Nanogranules: An efficient catalyst for energy conversion and storage**

*Rajat K. Tripathy, <sup>a, b</sup> Abhisek Padhy, <sup>a, b</sup> Nachiketa Sahu <sup>a, b</sup> and J.N. Behera\* <sup>a, b</sup>*

<sup>a</sup>School of Chemical Sciences, National Institute of Science Education and Research (NISER), An OCC of Homi Bhabha National Institute (HBNI), P. O. Jatni, Khurda 752050, Odisha, India. E-mail: jnbehera@niser.ac.in.

<sup>b</sup>Centre for Interdisciplinary Sciences (CIS), NISER, Jatni, Odisha, India 752050.

\*Corresponding author.

Email addresses: jnbehera@niser.ac.in

### Electrochemical calculations:

The intrinsic electrocatalytic activity of all the electrocatalysts were determined by iR compensating the recorded polarization plots as per the following equation,

$$E_{iR \text{ corrected}} = E_{\text{observed}} - iR \dots\dots\dots (1)$$

Here, i and R are the observed anodic current and solution resistance ( $R_s$ ) of the electrocatalyst.

The  $R_s$  was obtained from the Nyquist impedance spectrum recorded in the frequency range of 1 MHz to 0.1 Hz at an applied amplitude of 5 mV.

#### (a) Determination of Electrochemical active surface area (ECSA)

The electrochemical active surface area has been evaluated by measuring the double layer capacitance ( $C_{dl}$ ) of  $\text{Co}_{0.63}\text{Te}$ , Co-PBA,  $\text{Co}_{0.63}\text{Te}$  and  $\text{RuO}_2$ . For this, CVs are collected in a non-Faradaic region (1.24-1.26 V vs. Hg/HgO) at different scan rates (20, 40, 80, 100, 200 mV/s). The ECSA has a linear relation with double layer capacitance ( $C_{dl}$ ). ECSA was determined from the  $C_{dl}$  values by adopting following equation,<sup>1</sup>

$$ECSA = \frac{C_{dl}}{C_s} \dots\dots\dots (2)$$

#### (b) Calculation of specific capacitance, energy density and power density

The specific capacitance ( $C_s$ ) of  $\text{Co}_{0.63}\text{Te}$  has been calculated from both the cyclic voltammogram (equation 4) and galvanostatic charge-discharge profiles (equation 3) as per the following equations,<sup>2</sup>

$$C_s = \frac{\int_{V_a}^{V_c} I(V)dV}{m\vartheta(\Delta V)} \dots\dots\dots (3)$$

Here, the  $\int_{V_a}^{V_c} I(V)dV$ ,  $m$ ,  $\vartheta$ , ( $\Delta V$ ) are the integrated area of the CV curve, mass of the electrode material, scan rate and the optimized potential window taken for the measurement. Thereafter the energy density (ED) and power density (PD) was calculated from the  $C_s$  values as per the following,<sup>3</sup>

$$ED = \frac{C_s(\Delta V)^2}{2} \dots\dots\dots (4)$$

$$PD = \frac{C_s(\Delta V)\nu}{2} \dots\dots\dots (5)$$

**(c) Calculation of capacitive contribution**

At first the CVs of Co<sub>0.63</sub>Te modified electrode from 5 to 100 mV/s scan rate has been recorded. Thereafter the degree of capacitive effect has been calculated from the relation among the observed current (*i*) and scan rate (*ν*) from the CV curves as per the following equation,<sup>4,5</sup>

$$i = a\nu^b \dots\dots\dots (6)$$

Here both the “a” and “b” are the constants and the value of “b” varies from 0.5 to 1.0 that calculated from the slope of the plot of *log i* vs. *log ν* (Fig. 5c).

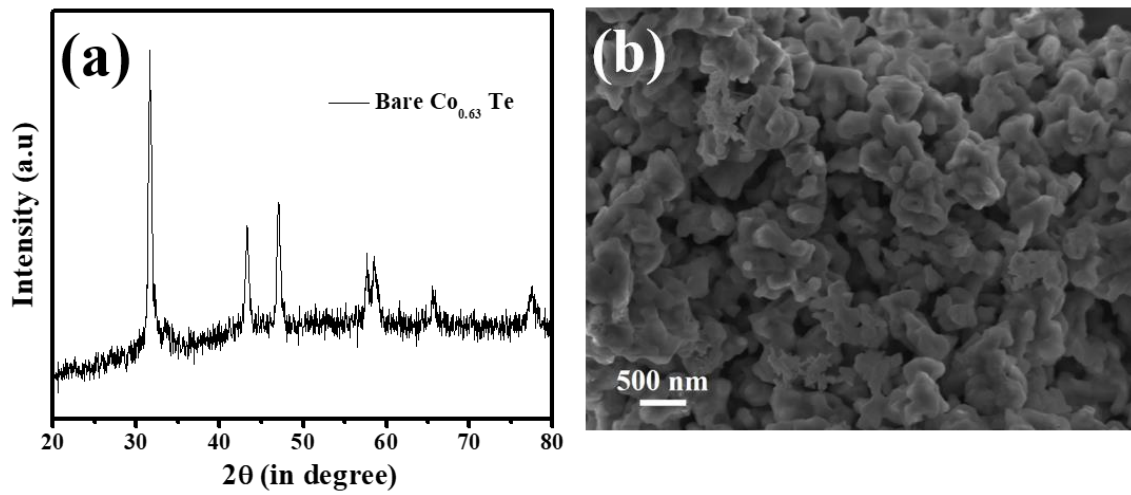

**Figure S 1.** PXR D (a), FESEM (b) of bare  $\text{Co}_{0.63}\text{Te}$ .

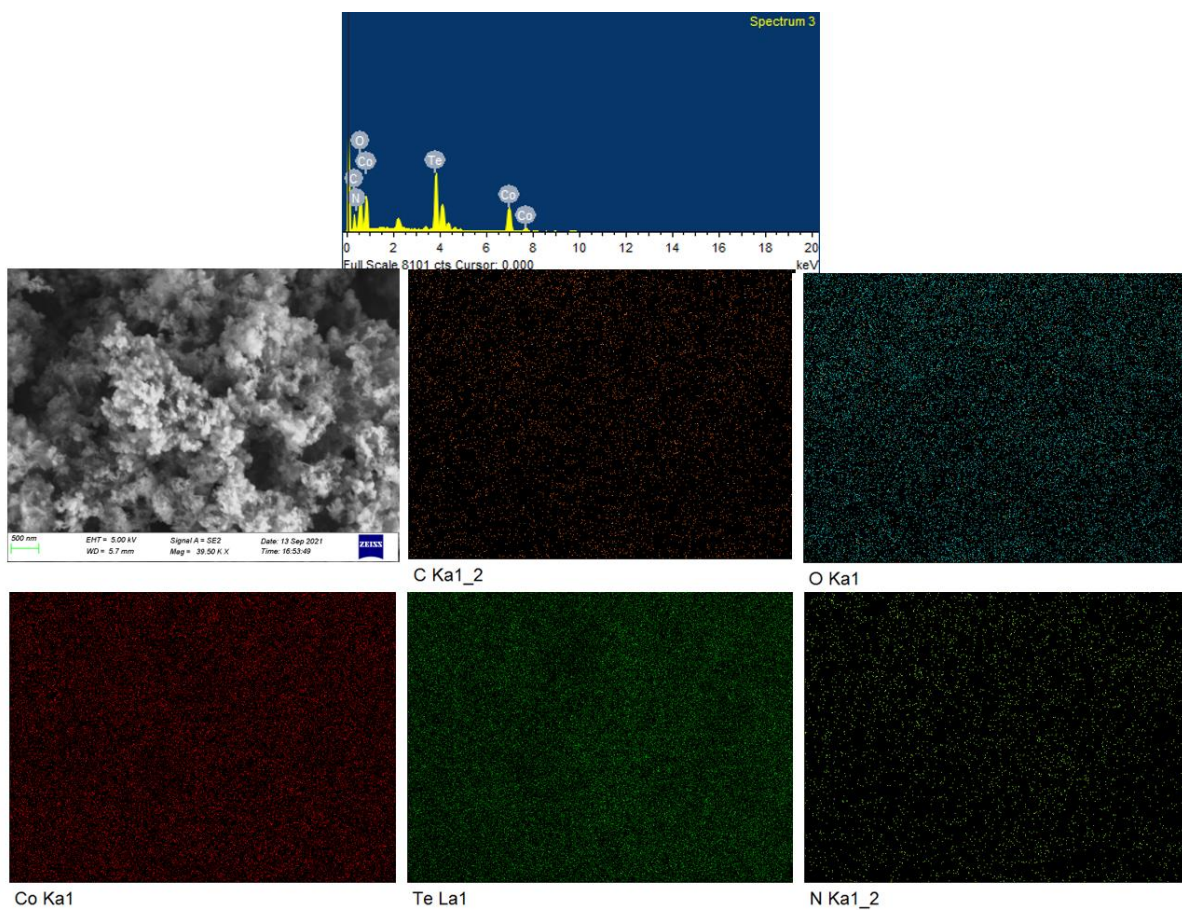

**Figure S 2.** EDS spectrum and elemental mapping of elements in  $\text{Co}_{0.63}\text{Te}$ .

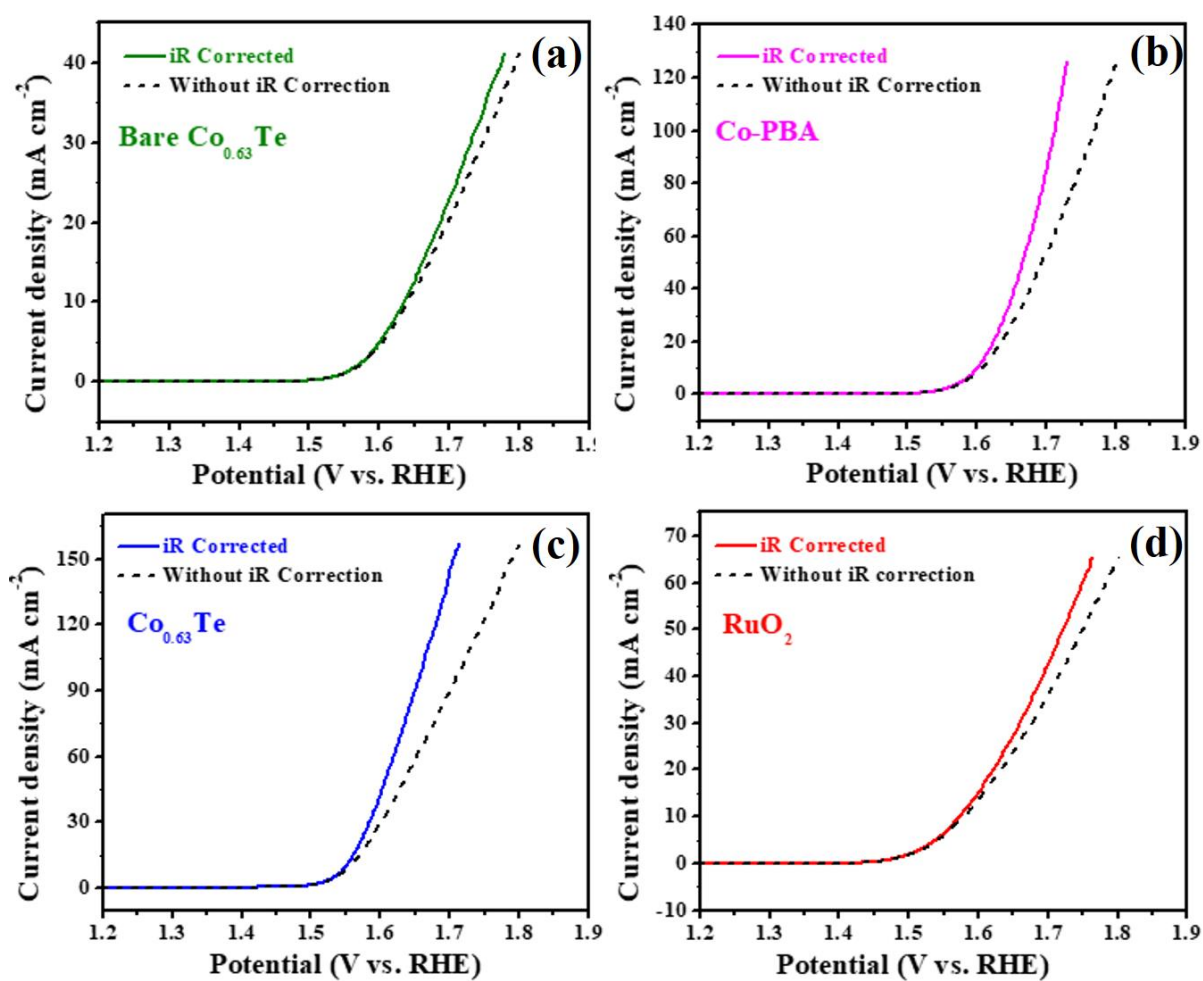

**Figure S 3.** OER LSV polarization curve for (a)  $\text{Co}_{0.63}\text{Te}$ , (b) Co-PBA, (c) bare  $\text{Co}_{0.63}\text{Te}$  and (d)  $\text{RuO}_2$  modified electrodes in 1 M KOH electrolyte at scan rate of 5 mV/s with and without iR compensation.

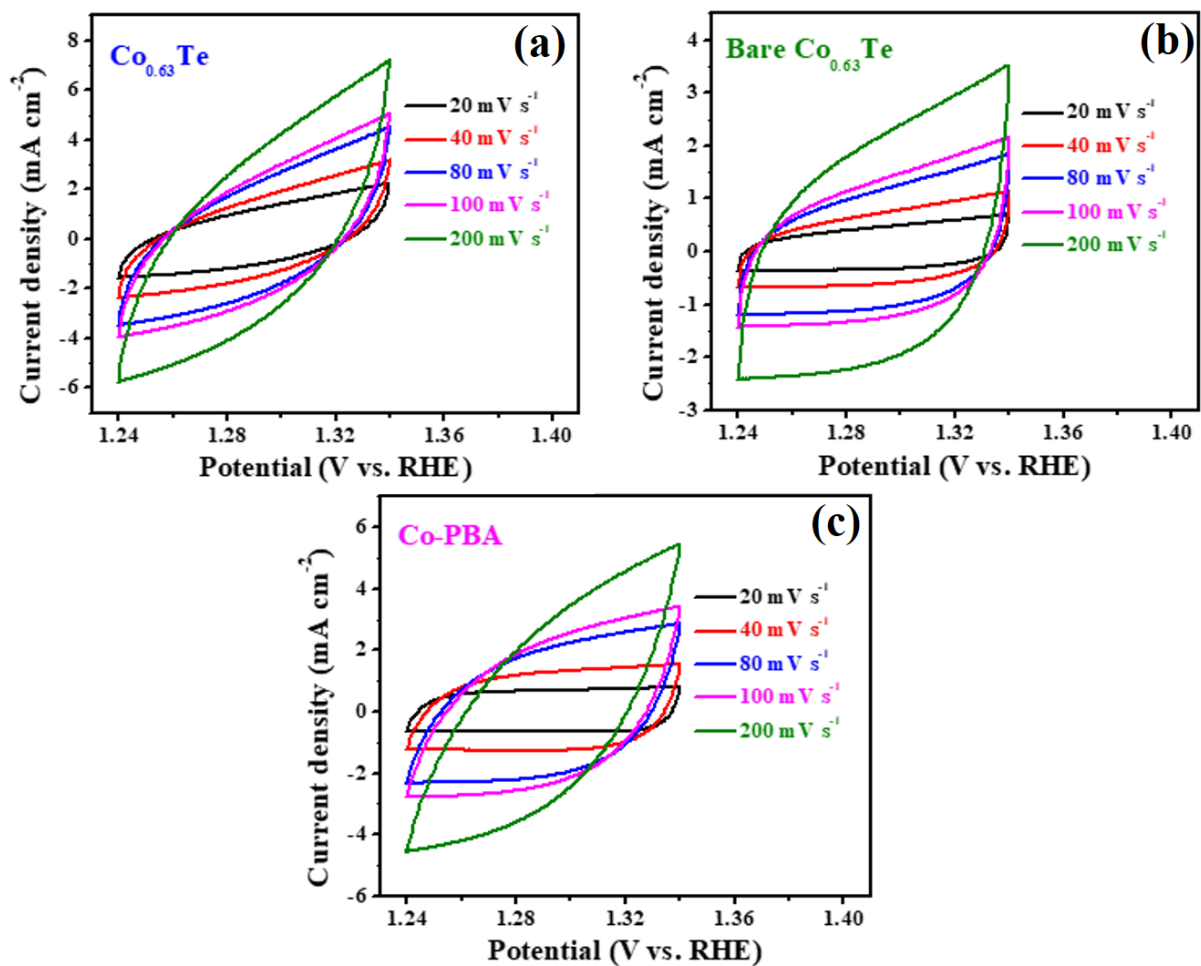

**Figure S 4.** CVs for (a) Co<sub>0.63</sub>Te, (b) bare Co<sub>0.63</sub>Te, (c) Co-PBA showing in a non-Faradaic region at a scan rate of 20, 40, 80, 100, 200 mV/s respectively.

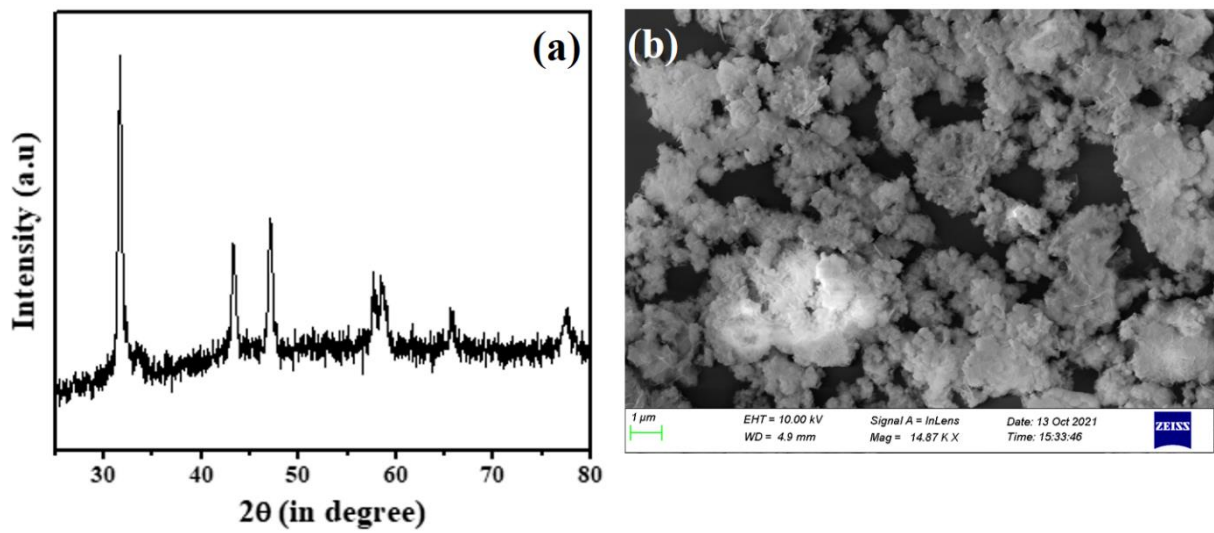

**Figure S 5.** Powder X-ray pattern (a), FESEM image of  $\text{Co}_{0.63}\text{Te}$  after OER.



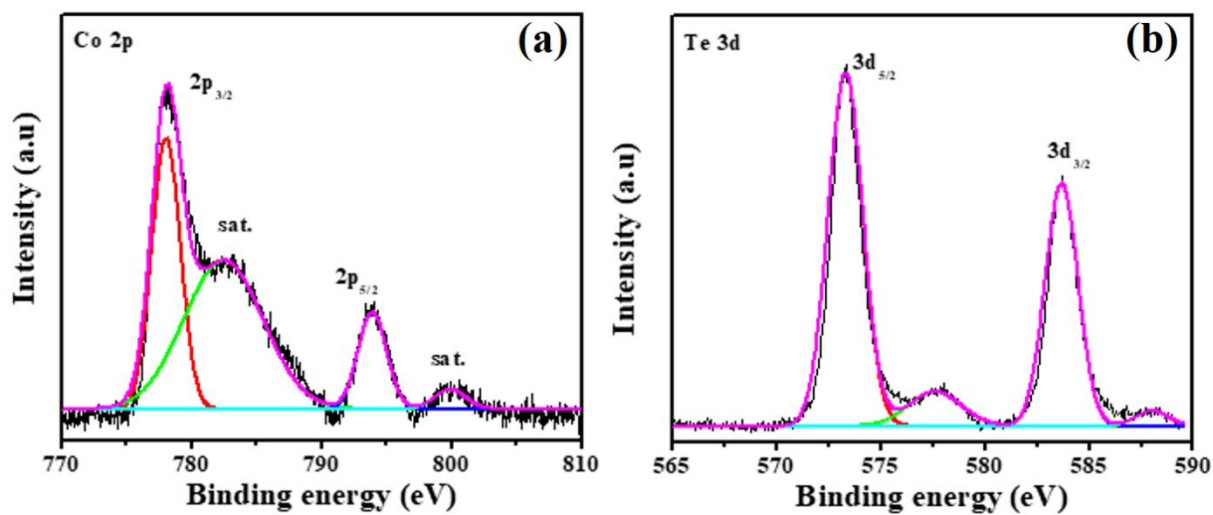

**Figure S 6.** XPS spectrum of (a) Co 2p (b) Te 3d in  $\text{Co}_{0.63}\text{Te}$  after OER.

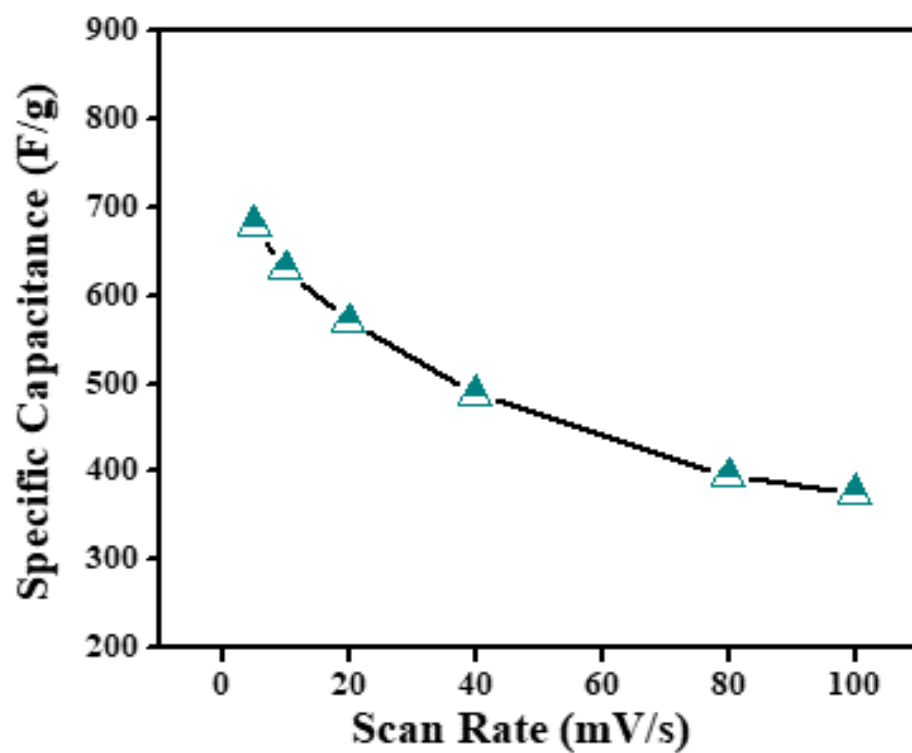

**Figure S 7.** Variation of specific capacitance with scan rate of  $\text{Co}_{0.63}\text{Te}$ .

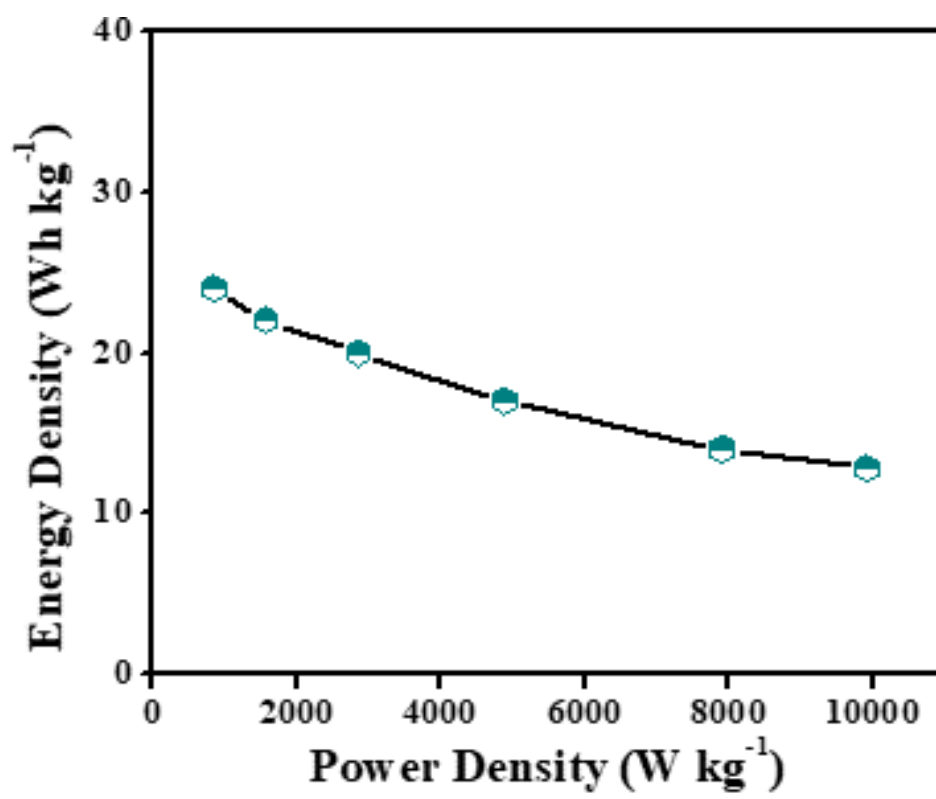

Figure S 8. Ragone plot of Co<sub>0.63</sub>Te.

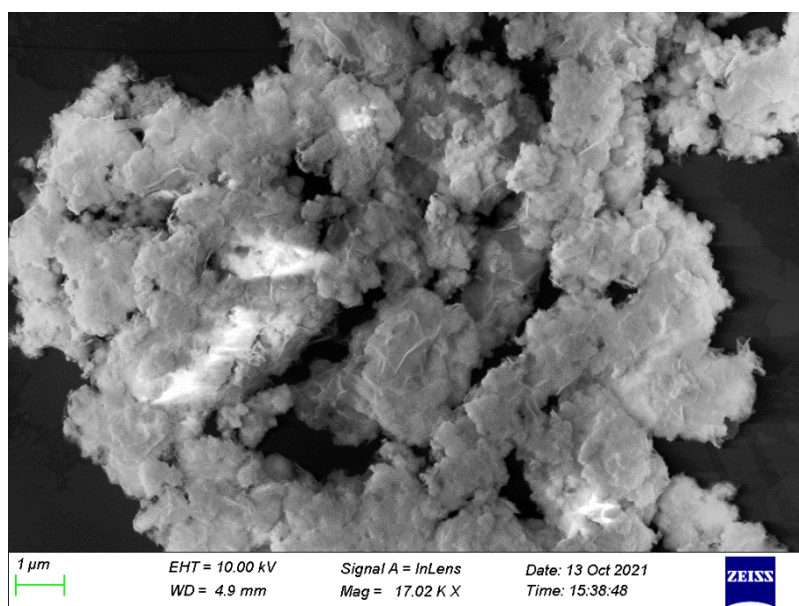

**Figure S 9.** FESEM image of Co<sub>0.63</sub>Te after 5000 CV cycles.

**Table S1.** Comparison of various cobalt telluride for oxygen evolution reaction.

| Catalysts                                               | Electrolyte (Conc) | Overpotential (mV) | Tafel slope (mV/decade) | References                                 |
|---------------------------------------------------------|--------------------|--------------------|-------------------------|--------------------------------------------|
| CoTe-Ni foam                                            | 1 M KOH            | 241                | 66                      | Fuel, 280, 2020, 118666                    |
| Co@CoTe <sub>2</sub>                                    | 1 M KOH            | 286                | 42                      | Inorg. Chem. Front., 2020,7, 2523-2532     |
| CoTe <sub>2</sub> @NCNTFs                               | 1 M KOH            | 330                | 82.8                    | J. Mater. Chem. A, 2018, 6, 3684           |
| CoTe                                                    | 1 M KOH            | 200                | 43.8                    | ACS Appl. Energy Mater. 2021, 4, 8158–8174 |
| CoTe <sub>2</sub> /CNT/GCE                              | 1 M KOH            | 290                | 44.2                    | J. Phys. Chem. C 2016, 120, 28093–28099    |
| CoTe <sub>2</sub> /GCE                                  | 1 M KOH            | 380                | 58.0                    | ACS Catal., 2016, 6, 7393-7397.            |
| CoTe <sub>2</sub> /CNT/GCE                              | 0.1 M KOH          | 357                | 32.0                    | Angew. Chem. Int. Ed. 2017, 56, 7769 –7773 |
| CoTe                                                    | 1 M KOH            | 445                | 93.1                    | Electrochimica Acta 321 (2019) 134656      |
| CoTe <sub>2</sub> @ NF                                  | 1 M KOH            | 340                | 54.0                    | Electrochim. Acta., 2019, 307, 451-458.    |
| CoTe/NR/NF                                              | 1 M KOH            | 350                | 75.0                    | Small Methods, 2019, 3, 1900113.           |
| Co(Te <sub>0.72</sub> Se <sub>0.28</sub> ) <sub>2</sub> | 1 M KOH            | 315                | 69.0                    | Nanoscale, 2019, 11, 6108-6119.            |
| <b>Co<sub>0.63</sub>Te</b>                              | <b>1 M KOH</b>     | <b>319</b>         | <b>56</b>               | <b>Our Work</b>                            |

**Table S2.** Comparison of various cobalt chalcogenides for supercapacitor application.

| <b>Catalysts</b>                           | <b>Electrolyte (Conc)</b> | <b>Specific Capacitance (F/g)</b> | <b>References</b>                                      |
|--------------------------------------------|---------------------------|-----------------------------------|--------------------------------------------------------|
| CoTe <sub>2</sub>                          | ----                      | 460                               | Ceram. Int. <b>2020</b> , <i>46</i> (5), 6991–6994     |
| NiCo <sub>2</sub> S <sub>4</sub> nanoplate | 3 M KOH                   | 437                               | ACS Sustainable Chem. Eng. 2014, <i>2</i> , 4, 809–815 |
| PCs/NiCo <sub>2</sub> S <sub>4</sub>       | 6 M KOH                   | 605.2                             | Applied surface science, 2019, <i>463</i> , 1001-1010  |
| NCS/graphene                               | 3 M KOH                   | 710                               | ACS Appl. Energy Mater. 2021, <i>4</i> , 8262-8274     |
| CoSe <sub>2</sub>                          | 6 M KOH                   | 333                               | J. Mater. Chem. C, 2021, <i>9</i> , 228                |
| NiSe <sub>2</sub>                          | 2 M KOH                   | 341                               | J. Mater. Chem. A, 2017, <i>5</i> , 3621               |
| <b>Co<sub>0.63</sub>Te</b>                 | <b>5 M KOH</b>            | <b>680</b>                        | <b>Our Work</b>                                        |

**Table S3.** Comparison of electrochemical parameters of some similar reported literature.

| Sl. No | Catalyst                                                      | Electrolyte | Overpotential ( $\eta$ ) (mV)             | Tafel slope (mV/decade) | Remarks                                                                                          | References                                     |
|--------|---------------------------------------------------------------|-------------|-------------------------------------------|-------------------------|--------------------------------------------------------------------------------------------------|------------------------------------------------|
| 1      | ED-CoTe, ED-CoTe <sub>2</sub> , HD-CoTe, HD-CoTe <sub>2</sub> | 1 M KOH     | 200, 240, 270, 320@10 mA/cm <sup>-2</sup> | 43.8, 44.8, 67.7, 111.8 | Electro deposition (ED), Hydrothermal (HD) route used on Au glass and carbon cloth respectively. | ACS Appl. Energy Mater. 2021, 4, 8158–8174     |
| 2      | NC-PB@ CNT                                                    | 1 M KOH     | 240@10 mA/cm <sup>-2</sup>                | 73                      | CNT incorporated Ni-Co-PBA on Ni foam.                                                           | Chemical Engineering Journal 426 (2021) 130773 |
| 3      | Co-Fe PBA                                                     | 1 M KOH     | 256@10 mA/cm <sup>-2</sup>                | 54                      | Nickel foam used as substrate by hydrothermal route.                                             | Nanoenergy, 2019, 2                            |
| 4      | Co/CoTe heterostructure                                       | 1 M KOH     | 400@50mA/cm <sup>-2</sup>                 | 94.1                    | Solvothermal followed by high temperature heating.                                               | Applied Surface Science, 581, 2022, 152405     |
| 5      | Co <sub>0.63</sub> Te (Present work)                          | 1 M KOH     | 317@ 10 mA/cm <sup>-2</sup>               | 56                      | Facile solvothermal approach. Catalyst coated on GCE.                                            | Our Work                                       |

## References

- 1 Charles C. L. McCrory, Suho Jung, Jonas C. Peters and Thomas F. Jaramillo, *J. Am. Chem. Soc.*, 2013, **135**, 16977–16987.
- 2 R. Ding, L. Qi and H. Wang, *J. Solid State Electrochem.*, 2012, **16**, 3621–3633.
- 3 S. Ratha and C. S. Rout, *ACS Appl. Mater. Interfaces*, 2013, **5**, 11427–11433.
- 4 S. Muduli, N. K. Rotte, V. Naresh and S. K. Martha, *J. Energy Storage*, 2020, **29**, 101330.

- 5 Z. Wang, Y. Liu, C. Gao, H. Jiang and J. Zhang, *J. Mater. Chem. A*, 2015, **3**, 20658–20663.
